# Supplementary material
Source: Research Square preprint supplement (doi:10.21203/rs.3.rs-8671837/v1)
Supplement: Supplementary file 2 [file ae23137806a76d6614ab1c3b.docx]

**Supplemental Appendix A: Search Strategy and Search History**

**PubMed:**

| **#** | **Searches** | **Results** |
| --- | --- | --- |
| #1 | (((((((((((((((((((Operating Room Nursing[MeSH Terms]) OR (Medical-Surgical Nursing[MeSH Terms])) OR (perioperative nursing[MeSH Terms])) OR (C)) OR (operating theatre nurs*[Title/Abstract])) OR (theatre nurs*[Title/Abstract])) OR (operating department nurs*[Title/Abstract])) OR (scrub nurs*[Title/Abstract])) OR (instrument nurs*[Title/Abstract])) OR (scrub practitioner*[Title/Abstract])) OR (scout nurs*[Title/Abstract])) OR (operating department practitioner[Title/Abstract])) OR (Surgical Technologist[Title/Abstract])) OR (operating theatre technologist[Title/Abstract])) OR (operating department technician[Title/Abstract])) OR (Surgical Nurs*[Title/Abstract])) OR (nurse practitioner*[Title/Abstract])) OR (perioperative specialist practitioner[Title/Abstract])) OR (surgical care practitioner[Title/Abstract])) OR (circulating nurs*[Title/Abstract])) OR (circulator[Title/Abstract]) | 32,463 |
| #2 | ((((((((((((((((((((((((education[MeSH Subheading]) OR (Clinical Competence[MeSH Terms])) OR (Aptitude[MeSH Terms])) OR (Clinical Skill*[Title/Abstract])) OR (Clinical Competenc*[Title/Abstract])) OR (capacit*[Title/Abstract])) OR (Aptitudes[Title/Abstract])) OR (Talent*[Title/Abstract])) OR (Abilit*[Title/Abstract])) OR (core competenc*[Title/Abstract])) OR (standard*[Title/Abstract])) OR (skill*[Title/Abstract])) OR (knowledge[Title/Abstract])) OR (curricul*[Title/Abstract])) OR (Course*[Title/Abstract])) OR (syllab*[Title/Abstract])) OR (teaching[Title/Abstract])) OR (training[Title/Abstract])) OR (nursing competence*[Title/Abstract])) OR (attitude*[Title/Abstract])) OR (skill*[Title/Abstract])) OR (professional competence*[Title/Abstract])) OR (professional knowledge*[Title/Abstract])) OR (professional skill*[Title/Abstract])) OR (Professional Competence[MeSH Terms]) | 6,055,628 |
| #3 | (("Surveys and Questionnaires"[Mesh]) OR "Patient Reported Outcome Measures"[Mesh]) OR (((((((scale*[Title/Abstract]) OR (questionnaire*[Title/Abstract])) OR (survey*[Title/Abstract])) OR (checklist*[Title/Abstract])) OR (tool*[Title/Abstract])) OR (measure*[Title/Abstract])) OR (assessment[Title/Abstract])) | 8,119,454 |
| #4 | (((((((((instrumentation[MeSH Subheading]) OR (Methods[MeSH Subheading])) OR (Validation Study[Publication Type])) OR (Comparative Study[Publication Type])) OR (psychometr*[Title/Abstract])) OR (clinimetr*[Title/Abstract])) OR (clinometr*[Title/Abstract])) OR (Outcome Assessment, Health Care[MeSH Terms])) OR (outcome assessment[Title/Abstract])) OR (outcome measure*[Title/Abstract]OR "observer variation"[MeSH] OR "observer variation"[tiab] OR "Health Status Indicators"[Mesh] OR "reproducibility of results"[MeSH] OR reproducib*[tiab] OR "discriminant analysis"[MeSH] OR reliab*[tiab] OR unreliab*[tiab] OR valid*[tiab] OR "coefficient of variation"[tiab] OR coefficient[tiab] OR homogeneity[tiab] OR homogeneous[tiab] OR "internal consistency"[tiab] OR (cronbach*[tiab] AND (alpha[tiab] OR alphas[tiab])) OR (item[tiab] AND (correlation*[tiab] OR selection*[tiab] OR reduction*[tiab])) OR agreement[tw] OR precision[tw] OR imprecision[tw] OR "precise values"[tw] OR test-retest[tiab] OR (test[tiab] AND retest[tiab]) OR (reliab*[tiab] AND (test[tiab] OR retest[tiab])) OR stability[tiab] OR interrater[tiab] OR inter-rater[tiab] OR intrarater[tiab] OR intra-rater[tiab] OR intertester[tiab] OR inter-tester[tiab] OR intratester[tiab] OR intra-tester[tiab] OR interobserver[tiab] OR inter-observer[tiab] OR intraobserver[tiab] OR intra-observer[tiab] OR intertechnician[tiab] OR inter-technician[tiab] OR intratechnician[tiab] OR intra-technician[tiab] OR interexaminer[tiab] OR inter-examiner[tiab] OR intraexaminer[tiab] OR intra-examiner[tiab] OR interassay[tiab] OR inter-assay[tiab] OR intraassay[tiab] OR intra-assay[tiab] OR interindividual[tiab] OR inter-individual[tiab] OR intraindividual[tiab] OR intra-individual[tiab] OR interparticipant[tiab] OR inter-participant[tiab] OR intraparticipant[tiab] OR intra-participant[tiab] OR kappa[tiab] OR kappa’s[tiab] OR kappas[tiab] OR repeatab*[tw] OR ((replicab*[tw] OR repeated[tw]) AND (measure[tw] OR measures[tw] OR findings[tw] OR result[tw] OR results[tw] OR test[tw] OR tests[tw])) OR generaliza*[tiab] OR generalisa*[tiab] OR concordance[tiab] OR (intraclass[tiab] AND correlation*[tiab]) OR discriminative[tiab] OR "known group"[tiab] OR "factor analysis"[tiab] OR "factor analyses"[tiab] OR "factor structure"[tiab] OR "factor structures"[tiab] OR dimension*[tiab] OR subscale*[tiab] OR (multitrait[tiab] AND scaling[tiab] AND (analysis[tiab] OR analyses[tiab])) OR "item discriminant"[tiab] OR "interscale correlation*"[tiab] OR error[tiab] OR errors[tiab] OR "individual variability"[tiab] OR "interval variability"[tiab] OR "rate variability"[tiab] OR (variability[tiab] AND (analysis[tiab] OR values[tiab])) OR (uncertainty[tiab] AND (measurement[tiab] OR measuring[tiab])) OR "standard error of measurement"[tiab] OR sensitiv*[tiab] OR responsive*[tiab] OR (limit[tiab] AND detection[tiab]) OR "minimal detectable concentration"[tiab] OR interpretab*[tiab] OR ((minimal[tiab] OR minimally[tiab] OR clinical[tiab] OR clinically[tiab]) AND (important[tiab] OR significant[tiab] OR detectable[tiab]) AND (change[tiab] OR difference[tiab])) OR (small*[tiab] AND (real[tiab] OR detectable[tiab]) AND (change[tiab] OR difference[tiab])) OR "meaningful change"[tiab] OR "ceiling effect"[tiab] OR "floor effect"[tiab] OR "Item response model"[tiab] OR IRT[tiab] OR Rasch[tiab] OR "Differential item functioning"[tiab] OR DIF[tiab] OR "computer adaptive testing"[tiab] OR "item bank"[tiab] OR "cross-cultural equivalence"[tiab]) | 12,174,234 |
| #5 | #1 AND #2 AND #3 AND #4 | **2782** |

**Embaes:**

| **#** | **Searches** | **Results** |
| --- | --- | --- |
| #1 | 'operating room nursing'/exp OR 'medical surgical nursing'/exp OR 'perioperative nursing'/exp OR 'operation room nurs*':ti,ab,kw OR 'theatre nurs*':ti,ab,kw OR 'operating department nurs*':ti,ab,kw OR 'scrub nurs*':ti,ab,kw OR 'instrument nurs*':ti,ab,kw OR 'scrub practitioner':ti,ab,kw OR 'scout nurs*':ti,ab,kw OR 'operating department practitioner':ti,ab,kw OR 'surgical technologist':ti,ab,kw OR 'operating theatre technologist':ti,ab,kw OR 'operating department technician':ti,ab,kw OR 'surgical nurs*':ti,ab,kw OR 'nurse practitioner*':ti,ab,kw OR 'perioperative specialist practitioner':ti,ab,kw OR 'surgical care practitioner':ti,ab,kw OR 'circulating nurs*':ti,ab,kw OR 'circulator':ti,ab,kw | 39,134 |
| #2 | 'professional competence'/exp OR 'competenc*':ab,ti OR 'clinical competence*':ab,ti OR 'nursing competence*':ab,ti OR 'professional competence*':ab,ti | 177,796 |
| #3 | 'questionnaire'/exp OR 'patient-reported outcome'/exp OR 'scale*':ab,ti OR 'questionnaire*':ab,ti OR 'survey*':ab,ti OR 'checklist*':ab,ti OR 'tool*':ab,ti OR 'measure*':ab,ti OR 'assessment':ab,ti OR psychometr*:ab,ti OR 'outcome assessment':ab,ti OR 'observer variation':ab,ti OR reproducib*:ab,ti OR reliab*:ab,ti OR unreliab*:ab,ti OR valid*:ab,ti OR 'coefficient of variation':ab,ti OR coefficient:ab,ti OR homogeneity:ab,ti OR homogeneous:ab,ti OR 'internal consistency':ab,ti OR 'test retest':ab,ti OR stability:ab,ti OR interrater:ab,ti OR 'inter rater':ab,ti OR intrarater:ab,ti OR 'intrarater':ab,ti OR intertester:ab,ti OR 'inter tester':ab,ti OR intratester:ab,ti OR 'intra tester':ab,ti OR interobserver:ab,ti OR 'inter observer':ab,ti OR intraobserver:ab,ti OR 'intra observer':ab,ti OR intertechnician:ab,ti OR 'inter technician':ab,ti OR intratechnician:ab,ti OR 'intra technician':ab,ti OR interexaminer:ab,ti OR 'inter examiner':ab,ti OR intraexaminer:ab,ti OR 'intra examiner':ab,ti OR interassay:ab,ti OR 'inter assay':ab,ti OR intraassay:ab,ti OR 'intra assay':ab,ti OR interindividual:ab,ti OR 'inter individual':ab,ti OR intraindividual:ab,ti OR 'intra individual':ab,ti OR interparticipant:ab,ti OR 'inter participant':ab,ti OR intraparticipant:ab,ti OR 'intra participant':ab,ti OR kappa*:ab,ti OR generaliza*:ab,ti OR generalisa*:ab,ti OR concordance:ab,ti OR discriminative:ab,ti OR 'known group':ab,ti OR 'factor analysis':ab,ti OR 'factor analyses':ab,ti OR 'factor structure':ab,ti OR 'factor structures':ab,ti OR dimension*:ab,ti OR subscale*:ab,ti OR 'item discriminant':ab,ti OR 'interscale correlation*':ab,ti OR error:ab,ti OR errors:ab,ti OR 'individual variability':ab,ti OR 'interval variability':ab,ti OR 'rate variability':ab,ti OR 'standard error of measurement':ab,ti OR sensitiv*:ab,ti OR responsive*:ab,ti OR 'minimal detectable concentration':ab,ti OR interpretab*:ab,ti OR 'meaningful change':ab,ti OR 'ceiling effect':ab,ti OR 'floor effect':ab,ti OR 'item response model':ab,ti OR irt:ab,ti OR rasch:ab,ti OR 'differential item functioning':ab,ti OR dif:ab,ti OR 'computer adaptive testing':ab,ti OR 'item bank':ab,ti OR 'cross-cultural equivalence':ab,ti | 14,570,049 |
| #4 | #1 AND #2 AND #3 | 1,133 |
| #5 | #12 AND #14 AND #16 AND ([chinese]/lim OR [english]/lim) | **1,121** |

Web of Science:

| **#** | **Searches** | **Results** |
| --- | --- | --- |
| #1 | TS=(Operating Room Nursing OR Medical-Surgical Nursing OR perioperative nursing OR operation room nurs* OR operating theatre nurs* OR theatre nurs* OR operating department nurs* OR scrub nurs* OR instrument nurs* OR scrub practitioner* OR scout nurs* OR operating department practitioner OR Surgical Technologist OR operating theatre technologist OR operating department technician OR Surgical Nurs* OR nurse practitioner* OR perioperative specialist practitioner OR surgical care practitioner OR circulating nurs* OR circulator) | 247,900 |
| #2 | TS=(competenc* OR clinical competence* OR nursing competence* OR professional competence* ) | 610,738 |
| #3 | TS=(scale*OR questionnaire* OR survey* OR checklist* OR tool* OR measure* OR assessment OR reported outcome measures) | 28,903,083 |
| #4 | #1 AND #2 AND #3 | **6280** |

Languages:Shinese or English

Document type： article and review article

CINAHL Complete:

| **#** | **Searches** | **Results** |
| --- | --- | --- |
| #1 | MW( Operating Room Nursing OR [Operating Room Nurses](javascript:XslPostBack('ctl00$ctl00$MainContentArea$MainContentArea$ctrlResults','meshDetail','index|2$term|Operating Room Nurses$cmd|meshDetail');" \o "Operating Room Nurses)) OR SU(operation room nurs* OR operating theatre nurs* OR theatre nurs* OR operating department nurs* OR scrub nurs* OR instrument nurs* OR scrub practitioner* OR scout nurs* OR operating department practitioner OR Surgical Technologist OR operating theatre technologist OR operating department technician OR Surgical Nurs* OR nurse practitioner* OR perioperative specialist practitioner OR surgical care practitioner OR circulating nurs* OR circulator) | 36,453 |
| #3 | MW Professional Competence OR MW Clinical Competence OR SU ( competenc OR nursing competence* OR professional competence* ) | 70,564 |
| #4 | SU ( scale*OR questionnaire* OR survey* OR checklist* OR tool* OR measure* OR assessment ) OR MW Patient-Reported Outcomes | 925,371 |
| #5 | #1 AND #2 AND #3 | 353 |

Psychinfo:

| **#** | **Searches** | **Results** |
| --- | --- | --- |
| #1 | MW(Operating Room Nursin OR [Operating Room Nurses](javascript:XslPostBack('ctl00$ctl00$MainContentArea$MainContentArea$ctrlResults','meshDetail','index|2$term|Operating Room Nurses$cmd|meshDetail');" \o "Operating Room Nurses)) OR SU(operation room nurs* OR operating theatre nurs* OR theatre nurs* OR operating department nurs* OR scrub nurs* OR instrument nurs* OR scrub practitioner* OR scout nurs* OR operating department practitioner OR Surgical Technologist OR operating theatre technologist OR operating department technician OR Surgical Nurs* OR nurse practitioner* OR perioperative specialist practitioner OR surgical care practitioner OR circulating nurs* OR circulator) | 2,544 |
| #2 | MW Professional Competence OR MW Clinical Competence OR SU ( competenc OR nursing competence* OR professional competence* ) | 15,397 |
| #3 | AB ( scale*OR questionnaire* OR survey* OR checklist* OR tool* OR measure* OR assessment ) | 1,618,325 |
| #4 | #1 AND #2 AND #3 | **55** |

China National Knowledge Infrastructure:

| **#** | **Searches** | **Results** |
| --- | --- | --- |
| #1 | 手术室护士 + 手术护士+ 洗手护士 + 器械护士 + 巡回护士 | 16,632 |
| #2 | 核心能力 + 能力 + 胜任力 | 3,590,435 |
| #3 | 问卷 + 量表 + 工具 + 信度 + 效度 + 跨文化 + 测量学特性 + 测量属性 | 1,634,594 |
| #4 | #1 AND #2 AND #3 | 210 |

WanFang Data:

| **#** | **Searches** | **Results** |
| --- | --- | --- |
| #1 | (手术室护士)OR(手术护士)OR(洗手护士)OR(器械护士)OR(巡回护士) | 13,593 |
| #2 | (核心能力)OR(能力)OR(胜任力) | 2,101,705 |
| #3 | (评价)OR(评估)OR(测量)OR(问卷)OR(量表)OR(工具)OR(培训)OR(教育)OR(培养) | 8,433,826 |
| #4 | #1 AND #2 AND #3 | 353 |
